# Supplementary material for: Whisper: read sorting allows robust mapping of DNA sequencing data
Source: Oxford University Press journal article supplement (doi:10.1093/bioinformatics/bty927), 2018-11-06
Supplement: bioinformatics_35_12_2043_s5.pdf [file bioinformatics_35_12_2043_s5.pdf]

Supplementary material for article:  
Whisper: Read sorting allows robust mapping of sequencing data

Sebastian Deorowicz      Agnieszka Debudaj-Grabysz      Adam Gudyś  
Szymon Grabowski

July 13, 2018

## Contents

|          |                                     |          |
|----------|-------------------------------------|----------|
| <b>1</b> | <b>Examined programs</b>            | <b>2</b> |
| <b>2</b> | <b>Evaluation</b>                   | <b>3</b> |
| 2.1      | Real data . . . . .                 | 3        |
| 2.1.1    | Datasets . . . . .                  | 3        |
| 2.1.2    | Assessment of the results . . . . . | 4        |
| 2.2      | Simulated data . . . . .            | 5        |
| 2.2.1    | Datasets . . . . .                  | 5        |
| 2.3      | Assessment of the results . . . . . | 5        |
| <b>3</b> | <b>Environment</b>                  | <b>6</b> |
| <b>4</b> | <b>Additional results</b>           | <b>7</b> |
| 4.1      | Mapping times . . . . .             | 7        |
| 4.2      | Variant calling . . . . .           | 9        |
| 4.3      | Simulated data results . . . . .    | 12       |
| 4.3.1    | Various read lengths . . . . .      | 12       |
| 4.3.2    | Various base error rates . . . . .  | 14       |

# 1 Examined programs

The following programs were used in the experimental part. The running parameters for are also given.

- Bowtie2 v. 2.3.0  
`bowtie2 -x hg38 -p 12 -1 <r1.fastq.gz> -2 <r2.fastq.gz> -S <output.sam>`  
The pairs of files were mapped pair by pair.
- BWA-MEM v. 0.7.15-r1140  
`bwa mem -t 12 hg38 <r1.fastq> <r2.fastq> > <output.sam>`  
The pairs of files were mapped pair by pair.
- GEM v. 3.6.0-bundle-release  
`gem-mapper -t 12 -p -1 <r1.fastq.gz> -2 <r2.fastq.gz> -o <output.sam> -I hg38`  
The pairs of files were mapped pair by pair.
- Kart v. 2.1.0  
`kart aln -t 12 -i hg38 -f <r1.fastq> -f2 <r2.fastq> > <output.sam>`  
The pairs of files were mapped pair by pair. As Kart does not support gzipped input the files were initially decompressed before mapping:  
`gzip -d <r1.fastq.gz>`
- Whisper v. 1.0  
`whisper -t 12 -out <output.sam> hg38 @<reads.txt>`  
The file <reads.txt> contains pairs of names of files to be mapped separated by a semi-colon, e.g., in case of 3 pairs they are processed in a single run. Sample contents of <reads.txt>:  
`r1_1.fastq.gz;r1_2.fastq.gz`  
`r2_1.fastq.gz;r2_2.fastq.gz`  
`r3_1.fastq.gz;r3_2.fastq.gz`

## 2 Evaluation

### 2.1 Real data

#### 2.1.1 Datasets

Reference human genome HG38 was downloaded as a part of Genome Analysis Toolkit bundle <ftp://ftp.broadinstitute.org/bundle/hg38>). In the analysis we removed alternative and decay assemblies retaining 25 main chromosomes (22 autosomes, 2 allosomes and a mitochondrial chromosome).

The reads from NA12878 sample were downloaded from the EMBL-EBI European Nucleotide Archive:

```
ftp.sra.ebi.ac.uk/vol1/fastq/ERR174/ERR174324/ERR174324_1.fastq.gz
ftp.sra.ebi.ac.uk/vol1/fastq/ERR174/ERR174324/ERR174324_2.fastq.gz
ftp.sra.ebi.ac.uk/vol1/fastq/ERR174/ERR174325/ERR174325_1.fastq.gz
ftp.sra.ebi.ac.uk/vol1/fastq/ERR174/ERR174325/ERR174325_2.fastq.gz
ftp.sra.ebi.ac.uk/vol1/fastq/ERR174/ERR174326/ERR174326_1.fastq.gz
ftp.sra.ebi.ac.uk/vol1/fastq/ERR174/ERR174326/ERR174326_2.fastq.gz
ftp.sra.ebi.ac.uk/vol1/fastq/ERR174/ERR174327/ERR174327_1.fastq.gz
ftp.sra.ebi.ac.uk/vol1/fastq/ERR174/ERR174327/ERR174327_2.fastq.gz
ftp.sra.ebi.ac.uk/vol1/fastq/ERR174/ERR174328/ERR174328_1.fastq.gz
ftp.sra.ebi.ac.uk/vol1/fastq/ERR174/ERR174328/ERR174328_2.fastq.gz
```

The subsets for different coverages constituted of files:

- 14.4×:
  - ERR174324\_1, ERR174324\_2,
- 28.3×:
  - ERR174324\_1, ERR174324\_2,
  - ERR174325\_1, ERR174325\_2,
- 42.0×:
  - ERR174324\_1, ERR174324\_2,
  - ERR174325\_1, ERR174325\_2,
  - ERR174326\_1, ERR174326\_2,
- 55.6×:
  - ERR174324\_1, ERR174324\_2,
  - ERR174325\_1, ERR174325\_2,
  - ERR174326\_1, ERR174326\_2,
  - ERR174327\_1, ERR174327\_2,
- 69.2×:
  - ERR174324\_1, ERR174324\_2,
  - ERR174325\_1, ERR174325\_2,
  - ERR174326\_1, ERR174326\_2,
  - ERR174327\_1, ERR174327\_2,
  - ERR174328\_1, ERR174328\_2.

### 2.1.2 Assessment of the results

The variants were called according to the GATK Best Practice pipeline. We assumed mappings to be stored in `mappings.sam` file.

As the first step SAM files created by mapping software were converted to BAM format and sorted using `samtools 1.3.1-42-g0a15035` (<http://www.htslib.org>).

```
samtools view -@ <num-threads> -b -h mappings.sam > mappings.bam
```

```
samtools sort -T <temp-dir> -@ <num-threads> -O bam mappings.bam  
> mappings.sorted.bam
```

After that, Picard 2.9.2 (<https://broadinstitute.github.io/picard/>) was employed for marking duplicates and indexing BAM file:

```
java -jar picard-2.9.2.jar MarkDuplicates I=mappings.sorted.bam  
O=mappings.marked.bam M=mappings.metrics.txt ASSUME_SORTED=true
```

```
java -jar picard-2.9.2.jar AddOrReplaceReadGroups I=mappings.marked.bam  
O=mappings.rg.bam RGID=1 RGLB=lib1 RGPL=illumina RGPU=unit1 RGSM=NA12878
```

```
java -jar picard-2.9.2.jar BuildBamIndex I=mappings.rg.bam
```

These steps were followed by recalibrating quality scores with a use of Genome Analysis Toolkit v3.7-0-gcfedb67 (<https://software.broadinstitute.org/gatk>). As a source of known SNPs and indels we used dbSNP 1.38 and Mills and 1000G gold standard indels from GATK bundle (<ftp://ftp.broadinstitute.org/bundle/hg38>).

```
java -jar GenomeAnalysisTK.jar -nct <num-threads> -T BaseRecalibrator  
-R Homo_sapiens_assembly38.fasta -I mappings.rg.bam  
-knownSites dbsnp_138.hg38.vcf  
-knownSites Mills_and_1000G_gold_standard.indels.hg38.vcf  
-o mappings.bqsr.table
```

```
java -jar GenomeAnalysisTK.jar -nct <num-threads> -T PrintReads  
-R Homo_sapiens_assembly38.fasta -I mappings.rg.bam  
-BQSR mappings.bqsr.table -o mappings.recalibrated.bam
```

After recalibration, variants were called using GATK HaplotypeCaller.

```
java -jar GenomeAnalysisTK.jar -nct <num-threads> -T HaplotypeCaller  
-R Homo_sapiens_assembly38.fasta -I mappings.recalibrated.bam  
--genotyping_mode DISCOVERY -o mappings.raw.vcf
```

The accuracy of variant calling was assessed by `hap.py 0.2.12` package (<https://github.com/Illumina/hap.py>) on the basis of “true” variants obtained as a part of Genome in a Bottle project v3.3.2 ([ftp://ftp-trace.ncbi.nlm.nih.gov/giab/ftp/release/NA12878\\_HG001/NISTv3.3.2/GRCh38](ftp://ftp-trace.ncbi.nlm.nih.gov/giab/ftp/release/NA12878_HG001/NISTv3.3.2/GRCh38))

```
python hap.py HG001_GRCh38_...vcf.gz mappings.raw.vcf -f HG001_GRCh38_...bed  
-o mappings.happy.nist -r Homo_sapiens_assembly38.fasta --roc VQLSOD
```

## 2.2 Simulated data

### 2.2.1 Datasets

The datasets were generated using `wgsim` (<https://github.com/lh3/wgsim>) executed with default parameters. The 4 paired-end datasets for read lengths 75 bp, 100 bp, 125 bp, and 150 bp were obtained. Each containing 200 million pairs of reads. The used commands:

```
wgsim -N 200000000 -1 75 -2 75 hg38 sim_075_1.fq sim_075_2.fq
wgsim -N 200000000 -1 100 -2 100 hg38 sim_100_1.fq sim_100_2.fq
wgsim -N 200000000 -1 125 -2 125 hg38 sim_125_1.fq sim_125_2.fq
wgsim -N 200000000 -1 150 -2 150 hg38 sim_150_1.fq sim_150_2.fq
```

### 2.3 Assessment of the results

To evaluate the quality of mappings we used `wgsim_eval.py` included in the `wgsim` package in the following ways:

```
wgsim_eval.pl unique output.sam |
  ../wgsim_eval.pl alneval -g 30 -p > results_a1 2> results_a2
wgsim_eval.pl unique output.sam |
  ../wgsim_eval.pl alneval -g 30 -p -a > results_a1 2> results_a2
```

### 3 Environment

The computer used in test were of the following configuration:

- 2 Intel Xeon E5-2670 v3 CPU, 12 cores per CPU, each clocked at 2.3 GHz,
- 128 GiB RAM,
- 2 Seagate NAS HDD of size 6 TB each in RAID-0 configuration, hdparm -t reported read speed 360 MB/s.

## 4 Additional results

### 4.1 Mapping times

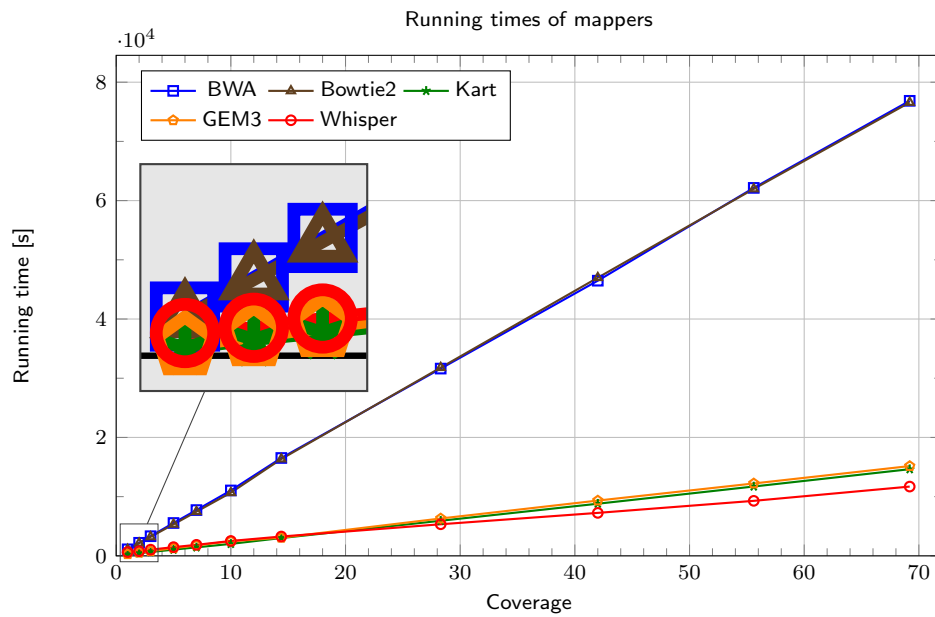

Figure 1: Comparison of mapping times for various coverages

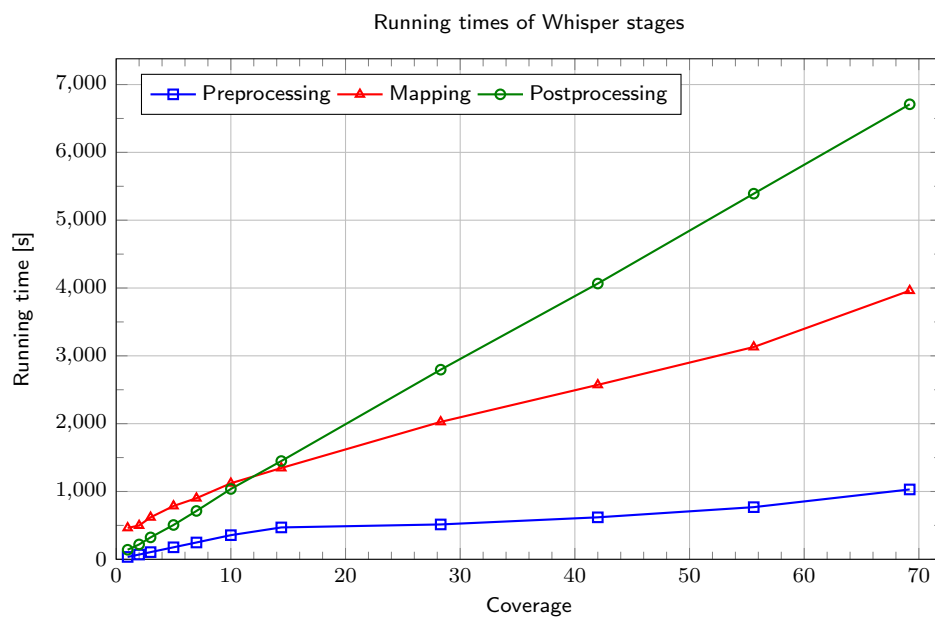

Figure 2: Comparison of running times of successive stages of Whisper

Table 1: Comparison of mapping times (in seconds) for various mappers for *H. sapiens* data. All reads are of length 101 bp.

| Coverage | No. of reads [M] | BWA    | Bowtie2 | Kart   | GEM3   | Whisper |
|----------|------------------|--------|---------|--------|--------|---------|
| 1.0      | 31               | 1,103  | 1,078   | 212    | 283    | 639     |
| 2.0      | 62               | 2,204  | 2,142   | 453    | 539    | 787     |
| 3.0      | 93               | 3,316  | 3,206   | 651    | 796    | 1,048   |
| 5.0      | 155              | 5,547  | 5,324   | 1,048  | 1,289  | 1,469   |
| 7.0      | 217              | 7,732  | 7,462   | 1,437  | 1,762  | 1,862   |
| 10.0     | 310              | 11,046 | 10,667  | 2,022  | 2,459  | 2,514   |
| 14.4     | 447              | 16,529 | 16,354  | 3,009  | 3,072  | 3,265   |
| 28.3     | 879              | 31,627 | 31,790  | 5,928  | 6,309  | 5,336   |
| 42.0     | 1,305            | 46,475 | 46,979  | 8,805  | 9,336  | 7,257   |
| 55.6     | 1,728            | 62,147 | 61,974  | 11,712 | 12,226 | 9,290   |
| 69.2     | 2,151            | 76,852 | 76,581  | 14,637 | 15,162 | 11,700  |

Table 2: Comparison of running times (in seconds) and RAM usage for various stages of Whisper for *H. sapiens* data

| Coverage | Running time  |         |                |        | RAM   |
|----------|---------------|---------|----------------|--------|-------|
|          | Preprocessing | Mapping | Postprocessing | Total  | Total |
| 1.0      | 35            | 463     | 141            | 639    | 10.5  |
| 2.0      | 70            | 498     | 219            | 787    | 10.7  |
| 3.0      | 106           | 619     | 323            | 1,048  | 10.7  |
| 5.0      | 177           | 786     | 506            | 1,469  | 11.9  |
| 7.0      | 248           | 901     | 713            | 1,862  | 12.0  |
| 10.0     | 356           | 1,121   | 1,037          | 2,514  | 12.6  |
| 14.4     | 470           | 1,346   | 1,449          | 3,265  | 13.5  |
| 28.3     | 514           | 2,026   | 2,796          | 5,336  | 14.6  |
| 42.0     | 619           | 2,572   | 4,066          | 7,257  | 15.8  |
| 55.6     | 769           | 3,130   | 5,391          | 9,290  | 16.0  |
| 69.2     | 1,030         | 3,961   | 6,709          | 11,700 | 15.8  |



## 4.2 Variant calling

Table 3: SNP variant calling for various coverages. ‘Rec.’ is for ‘Recall’, ‘Prec.’ is for ‘Precision’, ‘F1’ is for ‘F1 score’.

| Coverage | BWA-MEM |        |        | Bowtie2 |        |        | Kart   |        |        | GEM3   |        |        | Whisper |        |        |
|----------|---------|--------|--------|---------|--------|--------|--------|--------|--------|--------|--------|--------|---------|--------|--------|
|          | Rec.    | Prec.  | F1     | Rec.    | Prec.  | F1     | Rec.   | Prec.  | F1     | Rec.   | Prec.  | F1     | Rec.    | Prec.  | F1     |
| 14.4     | 0.9809  | 0.9908 | 0.9858 | 0.9646  | 0.9950 | 0.9796 | 0.9589 | 0.9587 | 0.9588 | 0.9630 | 0.9938 | 0.9782 | 0.9805  | 0.9894 | 0.9849 |
| 28.3     | 0.9965  | 0.9911 | 0.9938 | 0.9837  | 0.9958 | 0.9897 | 0.9923 | 0.9460 | 0.9686 | 0.9840 | 0.9948 | 0.9894 | 0.9965  | 0.9892 | 0.9929 |
| 42.0     | 0.9977  | 0.9901 | 0.9939 | 0.9863  | 0.9950 | 0.9906 | 0.9947 | 0.9525 | 0.9732 | 0.9873 | 0.9943 | 0.9907 | 0.9976  | 0.9881 | 0.9928 |
| 55.6     | 0.9981  | 0.9894 | 0.9937 | 0.9876  | 0.9943 | 0.9909 | 0.9954 | 0.9337 | 0.9636 | 0.9889 | 0.9938 | 0.9913 | 0.9979  | 0.9872 | 0.9925 |
| 69.2     | 0.9983  | 0.9889 | 0.9935 | 0.9883  | 0.9939 | 0.9911 | 0.9957 | 0.9278 | 0.9605 | 0.9898 | 0.9935 | 0.9916 | 0.9980  | 0.9866 | 0.9923 |

Table 4: Indel variant calling for various coverages. ‘Rec.’ is for ‘Recall’, ‘Prec.’ is for ‘Precision’, ‘F1’ is for ‘F1 score’.

| Coverage | BWA-MEM |        |        | Bowtie2 |        |        | Kart   |        |        | GEM3   |        |        | Whisper |        |        |
|----------|---------|--------|--------|---------|--------|--------|--------|--------|--------|--------|--------|--------|---------|--------|--------|
|          | Rec.    | Prec.  | F1     | Rec.    | Prec.  | F1     | Rec.   | Prec.  | F1     | Rec.   | Prec.  | F1     | Rec.    | Prec.  | F1     |
| 14.4     | 0.8004  | 0.9466 | 0.8674 | 0.7867  | 0.9479 | 0.8598 | 0.7639 | 0.9298 | 0.8387 | 0.7794 | 0.9476 | 0.8553 | 0.7996  | 0.9464 | 0.8669 |
| 28.3     | 0.9049  | 0.9678 | 0.9353 | 0.8941  | 0.9701 | 0.9305 | 0.8873 | 0.9513 | 0.9182 | 0.8898 | 0.9699 | 0.9282 | 0.9046  | 0.9678 | 0.9351 |
| 42.0     | 0.9359  | 0.9737 | 0.9544 | 0.9273  | 0.9765 | 0.9513 | 0.9248 | 0.9597 | 0.9419 | 0.9249 | 0.9767 | 0.9501 | 0.9361  | 0.9736 | 0.9545 |
| 55.6     | 0.9501  | 0.9758 | 0.9628 | 0.9421  | 0.9790 | 0.9602 | 0.9422 | 0.9627 | 0.9523 | 0.9411 | 0.9796 | 0.9600 | 0.9501  | 0.9758 | 0.9628 |
| 69.2     | 0.9571  | 0.9764 | 0.9667 | 0.9499  | 0.9800 | 0.9647 | 0.9500 | 0.9638 | 0.9568 | 0.9497 | 0.9810 | 0.9651 | 0.9571  | 0.9762 | 0.9666 |

### 4.3 Simulated data results

#### 4.3.1 Various read lengths

Table 5: Results for 200 million pairs of reads of length 75 bp with the default base error rate (0.020)

| Mapper  | Time [s] | All mappings |           | 'Good' mappings (MAPQ $\geq$ 20) |           |
|---------|----------|--------------|-----------|----------------------------------|-----------|
|         |          | Unmapped     | Incorrect | Unmapped                         | Incorrect |
| BWA-MEM | 16,234   | 0.00%        | 2.80%     | 4.50%                            | 0.02%     |
| Bowtie2 | 11,484   | 1.01%        | 6.68%     | 14.91%                           | 0.31%     |
| GEM     | 2,596    | 0.20%        | 3.03%     | 9.66%                            | 0.02%     |
| Kart    | 2,407    | 0.19%        | 3.84%     | 3.99%                            | 1.35%     |
| Whisper | 3,026    | 0.01%        | 2.84%     | 3.74%                            | 0.23%     |

Table 6: Results for 200 million pairs of reads of length 100 bp with the default base error rate (0.020)

| Mapper  | Time [s] | All mappings |           | 'Good' mappings (MAPQ $\geq$ 20) |           |
|---------|----------|--------------|-----------|----------------------------------|-----------|
|         |          | Unmapped     | Incorrect | Unmapped                         | Incorrect |
| BWA-MEM | 22,586   | 0.00%        | 2.29%     | 3.75%                            | 0.02%     |
| Bowtie2 | 13,901   | 0.53%        | 5.66%     | 13.19%                           | 0.23%     |
| GEM     | 3,205    | 0.15%        | 2.44%     | 7.26%                            | 0.04%     |
| Kart    | 2,762    | 0.19%        | 2.97%     | 3.25%                            | 1.08%     |
| Whisper | 4,400    | 0.00%        | 2.31%     | 3.19%                            | 0.14%     |

Table 7: Results for 200 million pairs of reads of length 125 bp with the default base error rate (0.020)

| Mapper  | Time [s] | All mappings |           | 'Good' mappings (MAPQ $\geq$ 20) |           |
|---------|----------|--------------|-----------|----------------------------------|-----------|
|         |          | Unmapped     | Incorrect | Unmapped                         | Incorrect |
| BWA-MEM | 25,685   | 0.00%        | 1.97%     | 3.27%                            | 0.01%     |
| Bowtie2 | 16,153   | 0.22%        | 4.89%     | 11.98%                           | 0.18%     |
| GEM     | 3,926    | 0.12%        | 2.09%     | 6.02%                            | 0.05%     |
| Kart    | 3,312    | 0.17%        | 2.54%     | 2.80%                            | 0.95%     |
| Whisper | 4,819    | 0.02%        | 1.99%     | 2.83%                            | 0.12%     |

Table 8: Results for 200 million pairs of reads of length 150 bp with the default base error rate (0.020)

| Mapper  | Time [s] | All mappings |           | 'Good' mappings (MAPQ $\geq$ 20) |           |
|---------|----------|--------------|-----------|----------------------------------|-----------|
|         |          | Unmapped     | Incorrect | Unmapped                         | Incorrect |
| BWA-MEM | 33,565   | 0.00%        | 1.73%     | 2.95%                            | 0.01%     |
| Bowtie2 | 20,755   | 0.08%        | 4.29%     | 11.34%                           | 0.15%     |
| GEM     | 4,374    | 0.09%        | 1.85%     | 5.18%                            | 0.06%     |
| Kart    | 3,660    | 0.16%        | 2.27%     | 2.51%                            | 0.88%     |
| Whisper | 5,084    | 0.06%        | 1.81%     | 2.62%                            | 0.14%     |

### 4.3.2 Various base error rates

Table 9: Results for 200 million pairs of reads of length 100 bp, base error rate 0.010

| Mapper  | Time [s] | All mappings |           | 'Good' mappings (MAPQ $\geq$ 20) |           |
|---------|----------|--------------|-----------|----------------------------------|-----------|
|         |          | Unmapped     | Incorrect | Unmapped                         | Incorrect |
| BWA-MEM | 15,038   | 0.00%        | 2.22%     | 3.69%                            | 0.01%     |
| Bowtie2 | 14,949   | 0.03%        | 4.60%     | 10.60%                           | 0.25%     |
| GEM     | 2,521    | 0.12%        | 2.22%     | 6.74%                            | 0.02%     |
| Kart    | 2,421    | 0.33%        | 2.36%     | 3.19%                            | 0.62%     |
| Whisper | 2,692    | 0.00%        | 2.20%     | 3.11%                            | 0.08%     |

Table 10: Results for 200 million pairs of reads of length 100 bp with, base error rate 0.015

| Mapper  | Time [s] | All mappings |           | 'Good' mappings (MAPQ $\geq$ 20) |           |
|---------|----------|--------------|-----------|----------------------------------|-----------|
|         |          | Unmapped     | Incorrect | Unmapped                         | Incorrect |
| BWA-MEM | 17,871   | 0.00%        | 2.26%     | 3.72%                            | 0.01%     |
| Bowtie2 | 14,285   | 0.16%        | 5.38%     | 12.45%                           | 0.25%     |
| GEM     | 2,983    | 0.15%        | 2.31%     | 6.92%                            | 0.03%     |
| Kart    | 2,692    | 0.25%        | 2.67%     | 3.21%                            | 0.85%     |
| Whisper | 3,554    | 0.00%        | 2.24%     | 3.14%                            | 0.11%     |

Table 11: Results for 200 million pairs of reads of length 100 bp, base error rate 0.020

| Mapper  | Time [s] | All mappings |           | 'Good' mappings (MAPQ $\geq$ 20) |           |
|---------|----------|--------------|-----------|----------------------------------|-----------|
|         |          | Unmapped     | Incorrect | Unmapped                         | Incorrect |
| BWA-MEM | 22,586   | 0.00%        | 2.29%     | 3.75%                            | 0.02%     |
| Bowtie2 | 13,901   | 0.53%        | 5.66%     | 13.19%                           | 0.23%     |
| GEM     | 3,205    | 0.15%        | 2.44%     | 7.26%                            | 0.04%     |
| Kart    | 2,762    | 0.19%        | 2.97%     | 3.25%                            | 1.08%     |
| Whisper | 4,400    | 0.00%        | 2.31%     | 3.19%                            | 0.14%     |

Table 12: Results for 200 million pairs of reads of length 100 bp, base error rate 0.025

| Mapper  | Time [s] | All mappings |           | 'Good' mappings (MAPQ $\geq$ 20) |           |
|---------|----------|--------------|-----------|----------------------------------|-----------|
|         |          | Unmapped     | Incorrect | Unmapped                         | Incorrect |
| BWA-MEM | 23,157   | 0.00%        | 2.34%     | 3.78%                            | 0.02%     |
| Bowtie2 | 13,800   | 1.26%        | 5.97%     | 14.31%                           | 0.21%     |
| GEM     | 3,566    | 0.14%        | 2.60%     | 7.77%                            | 0.05%     |
| Kart    | 3,076    | 0.15%        | 3.31%     | 3.31%                            | 1.33%     |
| Whisper | 5,260    | 0.02%        | 2.44%     | 3.28%                            | 0.21%     |

Table 13: Results for 200 million pairs of reads of length 100 bp, base error rate 0.030

| Mapper  | Time [s] | All mappings |           | 'Good' mappings (MAPQ $\geq$ 20) |           |
|---------|----------|--------------|-----------|----------------------------------|-----------|
|         |          | Unmapped     | Incorrect | Unmapped                         | Incorrect |
| BWA-MEM | 25,062   | 0.00%        | 2.38%     | 3.82%                            | 0.02%     |
| Bowtie2 | 13,192   | 2.44%        | 6.28%     | 15.88%                           | 0.19%     |
| GEM     | 3,768    | 0.14%        | 2.78%     | 8.45%                            | 0.06%     |
| Kart    | 3,346    | 0.14%        | 3.69%     | 3.41%                            | 1.62%     |
| Whisper | 6,088    | 0.07%        | 2.65%     | 3.44%                            | 0.31%     |
